# Supplementary material for: Disadvantages in preparing and publishing scientific papers caused by the dominance of the English language in science: The case of Colombian researchers in biological sciences
Source: PLoS One. 2020 Sep 16;15(9):e0238372. doi: 10.1371/journal.pone.0238372 (PMC7494110; doi:10.1371/journal.pone.0238372)
Supplement: S3 File — Questions in English of the survey “Implications of language in scientific publications”. (XLSX) [file pone.0238372.s003.xlsx]

## Sheet: Hoja2
	The translation of the introductory text of the survey is attached below:
	“With this survey, they are contributing anonymously to a thesis of the Master in Scientific Communication of the University of Barcelona. The project is about the importance of multilingualism in scientific publications, especially in the process of writing articles. This survey is aimed at Spanish-speaking people (with emphasis on Colombians) who are doing or have completed a doctorate in natur…
	Question	Category
	Nationality
	Country in which you live
	Age
	Type of institution where he studied high school or high school	Public	Private
	Type of institution where he completed his undergraduate studies	Public	Private
	Choose the occupation to which it belongs: [Mother]	1.Large employers, senior managers of companies and Public Administration, high-level professionals	2.Managers and low level professionals	3.High level employees	4.Small employers and non-professional self-employed workers	5.Autonomous Agricultural Workers	6.Supervisors and technicians of lower rank	7.Trade and services workers of lower rank	8.Skilled manual workers	9.Unexperienced workers	10.Excluded from the labor market, unemployed without previous experience
	Choose the occupation to which it belongs: [Father]	1.Large employers, senior managers of companies and Public Administration, high-level professionals	2.Managers and low level professionals	3.High level employees	4.Small employers and non-professional self-employed workers	5.Autonomous Agricultural Workers	6.Supervisors and technicians of lower rank	7.Trade and services workers of lower rank	8.Skilled manual workers	9.Unexperienced workers	10.Excluded from the labor market, unemployed without previous experience
	Choose the occupation to which you belong: [Maternal grandparents]	1.Large employers, senior managers of companies and Public Administration, high-level professionals	2.Managers and low level professionals	3.High level employees	4.Small employers and non-professional self-employed workers	5.Autonomous Agricultural Workers	6.Supervisors and technicians of lower rank	7.Trade and services workers of lower rank	8.Skilled manual workers	9.Unexperienced workers	10.Excluded from the labor market, unemployed without previous experience
	Choose the occupation to which you belong: [Paternal grandparents]	1.Large employers, senior managers of companies and Public Administration, high-level professionals	2.Managers and low level professionals	3.High level employees	4.Small employers and non-professional self-employed workers	5.Autonomous Agricultural Workers	6.Supervisors and technicians of lower rank	7.Trade and services workers of lower rank	8.Skilled manual workers	9.Unexperienced workers	10.Excluded from the labor market, unemployed without previous experience
	Choose the occupation you belong to: [Brother 1]	1.Large employers, senior managers of companies and Public Administration, high-level professionals	2.Managers and low level professionals	3.High level employees	4.Small employers and non-professional self-employed workers	5.Autonomous Agricultural Workers	6.Supervisors and technicians of lower rank	7.Trade and services workers of lower rank	8.Skilled manual workers	9.Unexperienced workers	10.Excluded from the labor market, unemployed without previous experience
	Choose the occupation you belong to: [Brother 2]	1.Large employers, senior managers of companies and Public Administration, high-level professionals	2.Managers and low level professionals	3.High level employees	4.Small employers and non-professional self-employed workers	5.Autonomous Agricultural Workers	6.Supervisors and technicians of lower rank	7.Trade and services workers of lower rank	8.Skilled manual workers	9.Unexperienced workers	10.Excluded from the labor market, unemployed without previous experience
	Choose the occupation you belong to: [Brother 3]	1.Large employers, senior managers of companies and Public Administration, high-level professionals	2.Managers and low level professionals	3.High level employees	4.Small employers and non-professional self-employed workers	5.Autonomous Agricultural Workers	6.Supervisors and technicians of lower rank	7.Trade and services workers of lower rank	8.Skilled manual workers	9.Unexperienced workers	10.Excluded from the labor market, unemployed without previous experience
	Social housing stratum (Only if they live in Colombia) [You]	From 1 to 6
	Social housing stratum (Only if they live in Colombia) [Mother]	From 1 to 6
	Social housing stratum (Only if they live in Colombia) [Father]	From 1 to 6
	Social housing stratum (Only if they live in Colombia) [Paternal grandparents]	From 1 to 6
	Social housing stratum (Only if they live in Colombia) [Maternal grandparents]	From 1 to 6
	Social stratum of housing (Only if they live in Colombia) [Brother 1]	From 1 to 6
	Social housing stratum (Only if they live in Colombia) [Brother 2]	From 1 to 6
	Social housing stratum (Only if they live in Colombia) [Brother 3]	From 1 to 6
	First language (s)
	Language (s) that dominates
	Name of the program or field of the doctorate that realizes or realized
	University or institute where you do or did the doctorate
	Is the PhD already finished?	Yes	No
	If you have finished your doctorate, what is your current occupation?
	In what year did you start your doctorate?
	Approximate number of academic publications you have
	Percentage of your publications that you have made in ENGLISH
	Percentage of its publications that it has published in its FIRST LANGUAGE
	Once you have completed the results of a study, how long does it take to write the article if it is going to be published in ENGLISH?
	Once you have completed the results of a study, how long does it take to write the article if it is going to be published in its FIRST LANGUAGE?
	When writing an article to be published in English, you preferably?	Write in English directly	Write in your first language and then do the English translation
	Have you requested favors or paid for CORRECTION or REVISION of an article?	Yes, I have asked for favors	Yes, I have paid	Yes, both
	What is the percentage of items for which you have requested favors or / and paid for CORRECTION or REVISION of English? [Request a favor]
	What is the percentage of items for which you have requested favors or / and paid for CORRECTION or REVISION of English? [Paid out ]
	If you have paid, approximately how much do you pay for each item?
	If you have paid, what is the origin of that money?	Me	Me and coauthors	Institutions	Grants	Mixed sources	Other
	Have you asked for favors or paid to TRANSLATE an article in English?	Yes, I have asked for favors	Yes, I have paid	Yes, both
	What is the percentage of items for which you have requested favors or / and paid for the TRANSLATION in English? [Request a favor]
	What is the percentage of items for which you have requested favors or / and paid for the TRANSLATION in English? [Paid out]
	If you have paid, approximately how much do you pay for each item?
	If you have paid, what is the origin of that money?	Me	Me and coauthors	Institutions	Grants	Mixed sources	Other
	Have you ever stopped participating (or sending the summary to participate) in an international congress because you had to speak in English?	Yes	No
	Rate how eager you feel to speak at a congress? [Presenting in English]	1	2	3	4	5
	Rate how eager you feel to speak at a congress? [Presented in your first language]	1	2	3	4	5
	At the time of reading a scientific article in ENGLISH you believe that ... [Understand the text in general]	Easy	1	2	3	4	5	Difficult
	At the time of reading a scientific article in ENGLISH you believe that ... [Understanding scientific terminology is]	Easy	1	2	3	4	5	Difficult
	At the time of reading a scientific article in ENGLISH you believe that ... [Interpret figures and tables is]	Easy	1	2	3	4	5	Difficult
	At the time of reading a scientific article in FIRST LANGUAGE you believe that ... [Understand the text in general]	Easy	1	2	3	4	5	Difficult
	At the time of reading a scientific article in FIRST LANGUAGE you believe that ... [Understanding scientific terminology is]	Easy	1	2	3	4	5	Difficult
	At the time of reading a scientific article in FIRST LANGUAGE you believe that ... [Interpret figures and tables is]	Easy	1	2	3	4	5	Difficult
	At the time of writing a scientific article in ENGLISH you believe that ... [Writing the introduction is]	Easy	1	2	3	4	5	Difficult
	At the time of writing a scientific article in ENGLISH you believe that ... [Writing the methodology is]	Easy	1	2	3	4	5	Difficult
	At the time of writing a scientific article in ENGLISH you believe that ... [Writing the results is]	Easy	1	2	3	4	5	Difficult
	At the time of writing a scientific article in ENGLISH you believe that ... [Writing the discussion is]	Easy	1	2	3	4	5	Difficult
	At the time of writing a scientific article in ENGLISH you believe that ... [Writing the conclusion is]	Easy	1	2	3	4	5	Difficult
	At the time of writing a scientific article in your FIRST LANGUAGE you believe that ... [Writing the introduction is]	Easy	1	2	3	4	5	Difficult
	At the time of writing a scientific article in your FIRST LANGUAGE you believe that ... [Writing the methodology is]	Easy	1	2	3	4	5	Difficult
	At the time of writing a scientific article in your FIRST LANGUAGE you believe that ... [Writing the results is]	Easy	1	2	3	4	5	Difficult
	At the time of writing a scientific article in your FIRST LANGUAGE you believe that ... [Writing the discussion is]	Easy	1	2	3	4	5	Difficult
	At the time of writing a scientific article in your FIRST LANGUAGE you believe that ... [Writing the conclusion is]	Easy	1	2	3	4	5	Difficult
	Do you prefer to read scientific texts in your first language?	Yes	No
	Any magazine has rejected or released the correction of a scientific article for an incorrect writing of English?	Yes	No
	If you have any example of comments from the editors regarding the incorrect writing of English, please write it down
	What percentage of English do you speak daily?
	From what age did you start learning English?
	How many years have you studied or been studying English?
	Rate your learning experience at the institution (s) where you studied English	Bad	1	2	3	4	5	Excellent
	How many years have you lived in an English-speaking country or will you use English as your first language?
	Rate your current English level [Writing]	Bad	1	2	3	4	5	Excellent
	Rate your current English level [Speak]	Bad	1	2	3	4	5	Excellent
	Rate your current English level [Listen]	Bad	1	2	3	4	5	Excellent
	Rate your current English level [Reading]	Bad	1	2	3	4	5	Excellent
	Have you taken an English exam with international recognition?	Yes	No
