# Supplementary material for: Disadvantages in preparing and publishing scientific papers caused by the dominance of the English language in science: The case of Colombian researchers in biological sciences
Source: PLoS One. 2020 Sep 16;15(9):e0238372. doi: 10.1371/journal.pone.0238372 (PMC7494110; doi:10.1371/journal.pone.0238372)
Supplement: S4 File — Raw data obtained from the Survey in Spanish (original language). (XLSX) [file pone.0238372.s004.xlsx]

## Sheet: Respuestas de formulario 1
Nacionalidad	País en el que vive	Tipo de institución donde realizó sus estudios de bachillerato o secundaria	Tipo de institución donde realizó sus estudios universitarios de grado	Escoja la ocupación a la que pertenece: [Madre]	Escoja la ocupación a la que pertenece: [Padre]	Escoja la ocupación a la que pertenece: [Abuelos(as) maternos]	Escoja la ocupación a la que pertenece: [Abuelos(as) paternos]	Escoja la ocupación a la que pertenece: [Hermano(a) 1]	Escoja la ocupación a la que pertenece: [Hermano(a) 2]	Escoja la ocupación a la que pertenece: [Hermano(a) 3]	Estrato social de la vivienda (Solo si viven en Colombia) [Usted]	Estrato social de la vivienda (Solo si viven en Colombia) [Madre]	Estrato social de la vivienda (Solo si viven en Colombia) [Padre]	Estrato social de la vivienda (Solo si viven en Colombia) [Abuelos(as) paternos]	Estrato social de la vivienda (Solo si viven en Colombia) [Abuelos(as) maternos]	Estrato social de la vivienda (Solo si viven en Colombia) [Hermano(a) 1]	Estrato social de la vivienda (Solo si viven en Colombia) [Hermano(a) 2]	Estrato social de la vivienda (Solo si viven en Colombia) [Hermano(a) 3]	Primera lengua(s)	Idioma(s) que domina	Campo del doctorado que realiza o realizó	Ya finalizó el doctorado?	Si ya finalizó el doctorado, cuál es su ocupación actual?	¿En qué año inició el doctorado?	Número aproximado de publicaciones académicas que tiene	Porcentaje de sus publicaciones que ha realizado en INGLÉS	Porcentaje de sus publicaciones que ha publicado en su PRIMERA LENGUA	Una vez ya tiene completos los resultados de un estudio, cuánto tiempo se demora en el proceso de escritura del artículo si este se va a publicar en INGLÉS?	Una vez ya tiene completos los resultados de un estudio, cuánto tiempo se demora en el proceso de escritura del artículo si este se va a publicar en su PRIMERA LENGUA?	Al escribir un artículo que se va a publicar en inglés, usted preferentemente?	Ha pedido favores o pagado por CORRECIÓN o REVISIÓN del inglés un artículo?	¿Cuál es el porcentaje de artículos por los cuales ha pedido favores o/y pagado por CORRECIÓN o REVISIÓN del inglés? [Pedido un favor ]	¿Cuál es el porcentaje de artículos por los cuales ha pedido favores o/y pagado por CORRECIÓN o REVISIÓN del inglés? [Pagado ]	Si ha pagado, aproximadamente cuánto paga por cada artículo?	Si ha pagado, cuál es la procedencia de ese dinero?	Ha pedido favores o pagado por TRADUCIR un artículo al inglés?	¿Cuál es el porcentaje de artículos por los cuales ha pedido favores o/y pagado por la TRADUCCIÓN al inglés? [Pedido un favor]	¿Cuál es el porcentaje de artículos por los cuales ha pedido favores o/y pagado por la TRADUCCIÓN al inglés? [Pagado]	Si ha pagado, aproximadamente cuánto paga por cada artículo?	Si ha pagado, cuál es la procedencia de ese dinero?	Alguna vez ha dejado de participar (o de enviar el resumen para participar) en un congreso internacional por el hecho que debía hablar en inglés?	Califique que tan ansioso se siente por hablar en un congreso? [Presentando en inglés]	Califique que tan ansioso se siente por hablar en un congreso? [Presentado en su primera lengua]	En el momento de leer un artículo científico en INGLÉS usted cree que ... [Entender el texto en general ]	En el momento de leer un artículo científico en INGLÉS usted cree que ... [Entender la terminología científica es]	En el momento de leer un artículo científico en INGLÉS usted cree que ... [Interpretar figuras y tablas es]	En el momento de leer un artículo científico en PRIMERA LENGUA usted cree que ... [Entender el texto en general ]	En el momento de leer un artículo científico en PRIMERA LENGUA usted cree que ... [Entender la terminología científica es]	En el momento de leer un artículo científico en PRIMERA LENGUA usted cree que ... [Interpretar figuras y tablas es]
Colombia	EEUU	Colegio privado	Universidad privada	Grandes empleadores, los altos directivos de las empresas y la Administración Pública, profesionales de alto nivel	Grandes empleadores, los altos directivos de las empresas y la Administración Pública, profesionales de alto nivel	Grandes empleadores, los altos directivos de las empresas y la Administración Pública, profesionales de alto nivel	Grandes empleadores, los altos directivos de las empresas y la Administración Pública, profesionales de alto nivel	Directivos y profesionales de nivel bajo	Directivos y profesionales de nivel bajo	NA	NA	5	5	NA	NA	5	6	NA	Español	Inglés	Ciencias biológicas	No	NA	2013	9	1	Ninguna	10 dias, 4 horas diarias	NA	Escribe en inglés directamente	Sí, he pedido favores	1	Ninguno	NA	NA	No	NA	NA	NA	NA	No	Poco	Poco	Fácil	Fácil	Fácil	Fácil	Fácil	Fácil
Colombia	USA	Colegio privado	Universidad privada	Grandes empleadores, los altos directivos de las empresas y la Administración Pública, profesionales de alto nivel	Grandes empleadores, los altos directivos de las empresas y la Administración Pública, profesionales de alto nivel	Grandes empleadores, los altos directivos de las empresas y la Administración Pública, profesionales de alto nivel	Grandes empleadores, los altos directivos de las empresas y la Administración Pública, profesionales de alto nivel	Directivos y profesionales de nivel bajo	Excluidos del mercado laboral, desempleados sin experiencia previa	NA	NA	NA	NA	NA	NA	NA	NA	NA	Español	Inglés, Francés	Ciencias biológicas	Sí	Assistant professor	2010	7	1	Ninguna	30 días, 2-4 horas diarias	NA	Escribe en inglés directamente	Sí, he pedido favores	1	Ninguno	NA	NA	No	Ninguno	Ninguno	NA	NA	No	Regular	Regular	Fácil	Fácil	Fácil	Fácil	Fácil	Fácil
Colombia	EE.UU.	Colegio privado	Universidad pública	Pequeños empleadores y por los trabajadores autónomos no profesionales	Trabajadores manuales cualificados	Trabajadores no cualificados	Trabajadores manuales cualificados	Empleados de nivel alto	NA	NA	NA	NA	NA	NA	NA	NA	NA	NA	Español e Inglés	Español	Ciencias biológicas	No	NA	2017	5	0.4	0.6	30 días, 60 horas en el mes	30 días, 60 horas en el mes	Escribe en inglés directamente	Sí, ambas posibilidades	0.5	0.5	500	Recursos mixtos	Sí, he pagado	Ninguno	0.2	1500	Recursos mixtos	No	Extremadamente	Muy	Fácil	Fácil	Fácil	Fácil	Fácil	Fácil
Colombia	Colombia	Colegio público	Universidad pública	Trabajadores manuales cualificados	Trabajadores manuales cualificados	Trabajadores manuales cualificados	Trabajadores manuales cualificados	Empleados de nivel alto	Empleados de nivel alto	NA	3	3	3	3	3	3	3	NA	Español	Español	Ciencias biológicas	No	NA	2016	1	Ninguna	1	60 días, 4 horas diarias	30 días, 4 horas diarias	Escribe en inglés directamente	Sí, ambas posibilidades	1	NA	NA	Institución(es) académica(s)	Sí, he pedido favores	1	NA	NA	Institución(es) académica(s)	No	Extremadamente	Muy	Difícil	Regular	Regular	Regular	Regular	Regular
Colombia	Estados Unidos	Colegio privado	Universidad pública	Trabajadores manuales cualificados	Supervisores y técnicos de rango inferior	Supervisores y técnicos de rango inferior	Trabajadores manuales cualificados	Empleados de nivel alto	Trabajadores manuales cualificados	Trabajadores manuales cualificados	4	4	4	3	3	5	3	2	Español, Ingles	Ingles	Ciencias biológicas	No	NA	2015	14	0.9	0.1	NA	NA	Escribe en inglés directamente	Sí, he pedido favores	0.4	NA	NA	NA	No	NA	NA	NA	NA	Sí	Muy	Regular	Fácil	Fácil	Fácil	Muy fácil	Muy fácil	Muy fácil
Colombia	Colombia	Colegio público	Universidad pública	Trabajadores del comercio y los servicios de rango inferior	Empleados de nivel alto	Trabajadores autónomos agrícolas	Pequeños empleadores y por los trabajadores autónomos no profesionales	Trabajadores del comercio y los servicios de rango inferior	Trabajadores del comercio y los servicios de rango inferior	Trabajadores del comercio y los servicios de rango inferior	2	3	3	2	1	3	4	2	Español	Ingles	Ciencias biológicas	No	NA	NA	Autor principal 13 y coautor 4. Publicados 17, en revisión 2	0.4	0.6	180	30	Escribe en inglés directamente	Sí, he pedido favores	1	Ninguno	NA	NA	No	Ninguno	Ninguno	NA	NA	Sí	Regular	Extremadamente	Fácil	Regular	Fácil	Fácil	Fácil	Fácil
Colombia	Colombia	Colegio público	Universidad privada	Supervisores y técnicos de rango inferior	Supervisores y técnicos de rango inferior	Supervisores y técnicos de rango inferior	Supervisores y técnicos de rango inferior	Empleados de nivel alto	NA	NA	5	3	4	NA	NA	3	NA	NA	Español	Ingles	Ciencias biológicas	No	NA	2017	10	1	Ninguna	2 meses	1 mes	Escribe en inglés directamente	Sí, ambas posibilidades	0.8	0.2	100	Recursos mixtos	No	Ninguno	Ninguno	NA	NA	No quise una hacer presentación oral	Poco	Poco	Fácil	Fácil	Fácil	Fácil	Regular	Fácil
Colombia	Colombia	Colegio privado	Universidad pública	Directivos y profesionales de nivel bajo	Empleados de nivel alto	Excluidos del mercado laboral, desempleados sin experiencia previa	Trabajadores manuales cualificados	Empleados de nivel alto	NA	NA	5	4	4	NA	NA	2	NA	NA	Español e inglés	Español e inglés	Ciencias biológicas	Sí	Profesor	2011	17	1	Ninguna	1 a 2 meses, 4 horas diarias. Depende el tipo de articulo	No aplica	Escribe en inglés directamente	Sí, he pedido favores	0.7	Ninguno	No aplica	NA	No	Ninguno	Ninguno	No aplica	NA	No	Regular	Regular	Regular	Regular	Regular	Regular	Regular	Regular
Colombia	Australia	Colegio público	Universidad pública	Excluidos del mercado laboral, desempleados sin experiencia previa	Trabajadores no cualificados	Trabajadores no cualificados	Trabajadores no cualificados	Trabajadores manuales cualificados	Excluidos del mercado laboral, desempleados sin experiencia previa	NA	NA	1	1	1	2	3	1	NA	Español	Inglés	Ciencias biológicas	No	NA	2018	3	0.4	0.6	30 días, 3 horas diarias	25 días, 3 horas diarias	Escribe en inglés directamente	Sí, he pedido favores	1	Ninguno	NA	NA	No	Ninguno	Ninguno	NA	NA	No	Muy	Poco	Muy fácil	Muy fácil	Muy fácil	Muy fácil	Muy fácil	Muy fácil
Colombia	USA	Colegio privado	Universidad privada	Grandes empleadores, los altos directivos de las empresas y la Administración Pública, profesionales de alto nivel	Grandes empleadores, los altos directivos de las empresas y la Administración Pública, profesionales de alto nivel	Trabajadores manuales cualificados	Empleados de nivel alto	Grandes empleadores, los altos directivos de las empresas y la Administración Pública, profesionales de alto nivel	NA	NA	NA	NA	NA	NA	NA	NA	NA	NA	Español	Inglés	Ciencias biológicas	No	NA	2007	20	1	Ninguna	NA	NA	Escribe en inglés directamente	No	Ninguno	Ninguno	NA	NA	No	NA	NA	NA	NA	NA	Regular	Muy	Fácil	Fácil	Fácil	NA	NA	NA
Colombia	Estados Unidos	Colegio privado	Universidad pública	Excluidos del mercado laboral, desempleados sin experiencia previa	Directivos y profesionales de nivel bajo	Trabajadores manuales cualificados	Trabajadores manuales cualificados	Empleados de nivel alto	Directivos y profesionales de nivel bajo	NA	NA	NA	NA	NA	NA	NA	NA	NA	Español	Español, Inglés	Ciencias biológicas	Sí	Postdoc	2011	20	0.8	0.2	5 meses	2 meses	Escribe en inglés directamente	Sí, he pedido favores	1	NA	NA	NA	Sí, he pedido favores	1	NA	NA	NA	No	Extremadamente	Regular	Fácil	Fácil	Fácil	Muy fácil	Muy fácil	Muy fácil
Colombia	Bogotá	Colegio privado	Universidad pública	Directivos y profesionales de nivel bajo	Directivos y profesionales de nivel bajo	Directivos y profesionales de nivel bajo	Directivos y profesionales de nivel bajo	NA	NA	NA	3	3	3	3	3	NA	NA	NA	Portugués, inglés	Portugués	Ciencias biológicas	No	NA	NA	6	0.9	0.1	20 días	4 días	Escribe en inglés directamente	Sí, he pedido favores	0.2	NA	NA	NA	Sí, he pedido favores	0.2	NA	NA	NA	No	Extremadamente	Poco	Fácil	Regular	Fácil	Fácil	Fácil	Fácil
Colombia	Colombia	Colegio público	Universidad pública	NA	NA	NA	Abuelos(as) paternos	Abuelos(as) maternos	Madre	NA	3	2	2	3	2	3	NA	NA	Español	Inglés portugués	Ciencias biológicas	No	NA	2018	15	0.8	0.2	2 meses	NA	Escribe en inglés directamente	Sí, ambas posibilidades	0.7	0.3	40	Únicamente yo	Sí, ambas posibilidades	0.7	0.3	40	Únicamente yo	Sí	Regular	Nada	Fácil	Muy fácil	Muy fácil	Muy fácil	Muy fácil	Muy fácil
Colombia	Colombia	Colegio privado	Universidad privada	Supervisores y técnicos de rango inferior	Directivos y profesionales de nivel bajo	Trabajadores autónomos agrícolas	Trabajadores autónomos agrícolas	Excluidos del mercado laboral, desempleados sin experiencia previa	Excluidos del mercado laboral, desempleados sin experiencia previa	NA	5	4	4	4	2	4	4	NA	Español e Inglés	Español e Inglés	Ciencias biológicas	Sí	Profesora Asociada	2009	12	1	Ninguna	2 a 3 semanas - 3 a 4 horas diarias	NA	Escribe en inglés directamente	Sí, he pedido favores	0.3	Ninguno	NA	NA	No	Ninguno	Ninguno	NA	NA	No	Regular	Regular	Muy fácil	Muy fácil	Muy fácil	Muy fácil	Muy fácil	Muy fácil
Colombia	Escocia	Colegio público	Universidad pública	NA	NA	NA	NA	NA	Grandes empleadores, los altos directivos de las empresas y la Administración Pública, profesionales de alto nivel	NA	NA	NA	NA	NA	NA	NA	NA	NA	Español	Inglés	Ciencias biológicas	No	NA	2017	3	1	Ninguna	20 días	NA	Escribe en inglés directamente	Sí, he pedido favores	0.8	Ninguno	NA	NA	No	Ninguno	Ninguno	NA	NA	No	Regular	Regular	Regular	Regular	Regular	Fácil	Fácil	Fácil
Colombia	Colombia	Colegio público	Universidad pública	NA	NA	NA	NA	Padre	NA	Abuelos(as) paternos	4	2	2	NA	NA	3	2	NA	Español	Inglés	Ciencias biológicas	No	NA	NA	2	1	Ninguna	180 días, 2 horas diarias	NA	Escribe en inglés directamente	Sí, he pedido favores	1	NA	NA	NA	No	NA	NA	NA	NA	Sí	Muy	Regular	Fácil	Regular	Regular	Fácil	Fácil	Regular
Colombia	Colombia	Colegio público	Universidad pública	NA	NA	NA	NA	NA	Hermano(a) 1	Hermano(a) 3	3	3	3	3	3	4	4	4	Español, Portugués	Español	Ciencias biológicas	Sí	Profesor universitario	2009	30	0.9	0.1	90 dias, 1 hora diaria	NA	Escribe en inglés directamente	Sí, he pedido favores	0.4	Ninguno	NA	Únicamente yo	No	0.4	Ninguno	NA	NA	Sí	Nada	Muy	Difícil	Regular	Fácil	Fácil	Muy fácil	Fácil
Colombia	Colombia	Colegio privado	Universidad privada	Empleados de nivel alto	Directivos y profesionales de nivel bajo	Pequeños empleadores y por los trabajadores autónomos no profesionales	Pequeños empleadores y por los trabajadores autónomos no profesionales	Directivos y profesionales de nivel bajo	NA	NA	6	6	NA	NA	NA	6	NA	NA	No	Español	Ciencias biológicas	Sí	Docente cátedra	2010	9	0.6	0.3	en promedio 1.5 años, 2 horas diarias	NA	Escribe en inglés directamente	Sí, ambas posibilidades	0.8	0.1	No recuerdo	Institución(es) académica(s)	No	Ninguno	Ninguno	NA	NA	No	Muy	Poco	Regular	Fácil	Fácil	Regular	Fácil	Fácil
Colombia	Australia	Colegio privado	Universidad privada	Supervisores y técnicos de rango inferior	Pequeños empleadores y por los trabajadores autónomos no profesionales	Excluidos del mercado laboral, desempleados sin experiencia previa	Excluidos del mercado laboral, desempleados sin experiencia previa	Empleados de nivel alto	NA	NA	NA	4	3	NA	NA	NA	NA	NA	Español	Inglés	Ciencias biológicas	No	NA	2017	10	0.9	0.1	20 días, 6 horas diarias	NA	Escribe en inglés directamente	Sí, he pedido favores	1	Ninguno	NA	NA	No	Ninguno	Ninguno	NA	NA	No	Muy	Poco	Fácil	Regular	Regular	Muy fácil	Muy fácil	Muy fácil
Colombia	Estados unidos	Colegio público	Universidad pública	Empleados de nivel alto	Empleados de nivel alto	Grandes empleadores, los altos directivos de las empresas y la Administración Pública, profesionales de alto nivel	Excluidos del mercado laboral, desempleados sin experiencia previa	Empleados de nivel alto	Trabajadores no cualificados	NA	NA	2	NA	2	2	NA	2	NA	Español, inglés	NA	Ciencias biológicas	Sí	Postdoctoral fellow	2013	3	Ninguna	1	Para phd tesis - 60 días, 4 horas diarias	Para Ms tesis- 60 días	Escribe en inglés directamente	No	Ninguno	Ninguno	NA	NA	No	Ninguno	Ninguno	NA	NA	No	Muy	Poco	Fácil	Fácil	Fácil	Regular	Fácil	Fácil
Colombia	Colombia	Colegio público	Universidad pública	Pequeños empleadores y por los trabajadores autónomos no profesionales	Empleados de nivel alto	Pequeños empleadores y por los trabajadores autónomos no profesionales	Pequeños empleadores y por los trabajadores autónomos no profesionales	Empleados de nivel alto	Excluidos del mercado laboral, desempleados sin experiencia previa	Excluidos del mercado laboral, desempleados sin experiencia previa	4	4	4	4	4	4	4	4	Español	Inglés, portugués	Ciencias biológicas	No	NA	2018	14	0.3	0.7	1 mes	15 días	Escribe en mi lengua madre y hago la traducción al inglés	Sí, ambas posibilidades	0.5	0.5	30 dólares	Únicamente yo	Sí, ambas posibilidades	0.3	0.3	100 dólares	Únicamente yo	No	Regular	Nada	Fácil	Regular	Fácil	Muy fácil	Muy fácil	Muy fácil
Colombia	Francia	Colegio privado	Universidad privada	Empleados de nivel alto	Empleados de nivel alto	Empleados de nivel alto	Trabajadores del comercio y los servicios de rango inferior	Empleados de nivel alto	NA	NA	NA	6	6	5	5	6	NA	NA	español	Inglés y francés	Ciencias biológicas	Sí	postdoc	2012	Siete	1	Ninguna	un mes, 6 horas diarias	no lo he hecho	Escribe en inglés directamente	Sí, he pedido favores	0.8	Ninguno	NA	NA	No	Ninguno	Ninguno	NA	NA	No	Poco	Poco	Fácil	Muy fácil	Muy fácil	Regular	Fácil	Fácil
Colombia	Colombia	Colegio público	Universidad pública	Trabajadores del comercio y los servicios de rango inferior	Empleados de nivel alto	Trabajadores autónomos agrícolas	Trabajadores autónomos agrícolas	Empleados de nivel alto	Empleados de nivel alto	Trabajadores del comercio y los servicios de rango inferior	3	3	3	2	2	3	4	3	español	ingles	Ciencias biológicas	Sí	descansando	2011	5	0.8	0.2	120 dias	100 días	Escribe en inglés directamente	Sí, he pedido favores	1	Ninguno	NA	Únicamente yo	Sí, ambas posibilidades	0.6	0.4	60 usd	Únicamente yo	No quise una hacer presentación oral	Extremadamente	Regular	Muy fácil	Muy fácil	Muy fácil	Muy fácil	Muy fácil	Muy fácil
Colombia	Chile	Colegio privado	Universidad privada	Trabajadores del comercio y los servicios de rango inferior	Trabajadores autónomos agrícolas	Trabajadores del comercio y los servicios de rango inferior	Trabajadores autónomos agrícolas	Trabajadores del comercio y los servicios de rango inferior	Trabajadores del comercio y los servicios de rango inferior	NA	NA	3	1	1	4	2	2	NA	Español	Inglés	Ciencias biológicas	Sí	Investigador posdoctoral	2014	16	0.8	0.2	4 días, 6 horas diarias	2 días, 3 horas diarias	Escribe en inglés directamente	Sí, he pagado	Ninguno	0.6	70	Recursos mixtos	No	Ninguno	Ninguno	NA	NA	No	Poco	Nada	Muy fácil	Muy fácil	Muy fácil	Muy fácil	Muy fácil	Muy fácil
Colombia	Colombia	Colegio privado	Universidad pública	Pequeños empleadores y por los trabajadores autónomos no profesionales	Pequeños empleadores y por los trabajadores autónomos no profesionales	NA	NA	Grandes empleadores, los altos directivos de las empresas y la Administración Pública, profesionales de alto nivel	NA	NA	3	3	3	3	2	3	NA	NA	Español e Ingles	Español	Ciencias biológicas	No	NA	2017	9	0.6	0.5	60 días, 2 horas diarias	30 días, 2 horas diarias	Escribe en mi lengua madre y hago la traducción al inglés	Sí, ambas posibilidades	0.4	0.1	100	Recursos mixtos	Sí, he pedido favores	0.4	NA	NA	NA	Sí	Extremadamente	Regular	Regular	Fácil	Fácil	Muy fácil	Muy fácil	Muy fácil
Colombia	Colombia	Colegio privado	Universidad pública	Pequeños empleadores y por los trabajadores autónomos no profesionales	Pequeños empleadores y por los trabajadores autónomos no profesionales	NA	NA	Grandes empleadores, los altos directivos de las empresas y la Administración Pública, profesionales de alto nivel	NA	NA	3	3	3	3	2	3	NA	NA	Español e Ingles	Español	Ciencias biológicas	No	NA	2017	9	0.6	0.5	60 días, 2 horas diarias	30 días, 2 horas diarias	Escribe en mi lengua madre y hago la traducción al inglés	Sí, ambas posibilidades	0.4	0.1	100	Recursos mixtos	Sí, he pedido favores	0.4	NA	NA	NA	Sí	Extremadamente	Regular	Regular	Fácil	Fácil	Muy fácil	Muy fácil	Muy fácil
Colombia	Bogotá	Colegio privado	Universidad pública	Grandes empleadores, los altos directivos de las empresas y la Administración Pública, profesionales de alto nivel	Grandes empleadores, los altos directivos de las empresas y la Administración Pública, profesionales de alto nivel	Pequeños empleadores y por los trabajadores autónomos no profesionales	Trabajadores autónomos agrícolas	Grandes empleadores, los altos directivos de las empresas y la Administración Pública, profesionales de alto nivel	NA	NA	4	4	4	4	4	4	NA	NA	Español	Inglés	Ciencias biológicas	Sí	Investigadora	2002	11	1	Ninguna	Tres meses, 5 horas diarias	Dos meses, 5 horas diarias	Escribe en inglés directamente	Sí, ambas posibilidades	0.8	0.1	60	Recursos mixtos	No	Ninguno	Ninguno	No he pagado	NA	No	Regular	Poco	Fácil	Fácil	Fácil	Muy fácil	Muy fácil	Muy fácil
Colombia	Alemania	Colegio privado	Universidad pública	Directivos y profesionales de nivel bajo	Grandes empleadores, los altos directivos de las empresas y la Administración Pública, profesionales de alto nivel	Supervisores y técnicos de rango inferior	Supervisores y técnicos de rango inferior	NA	NA	NA	NA	5	5	3	3	5	5	NA	Español	Inglés, Alemán	Ciencias biológicas	Sí	Investigador postdoctoral	2014	5	1	Ninguna	Depende	Más que en inglés	Escribe en inglés directamente	No	Ninguno	Ninguno	NA	NA	No	Ninguno	Ninguno	NA	NA	No	Nada	Nada	Fácil	Fácil	Fácil	Fácil	Fácil	Fácil
Colombia	Finlandia	Colegio privado	Universidad privada	Directivos y profesionales de nivel bajo	Directivos y profesionales de nivel bajo	Trabajadores no cualificados	Trabajadores no cualificados	Empleados de nivel alto	NA	NA	NA	4	4	3	4	5	NA	NA	Español	Inglés, Francés	Ciencias biológicas	NA	Lider de grupo	2007	24	1	Ninguna	una semana, 5h diarias en promedio	N/A	Escribe en inglés directamente	No	Ninguno	Ninguno	N/A	NA	No	Ninguno	Ninguno	NA	NA	No	Nada	Poco	Muy fácil	Muy fácil	Muy fácil	Muy fácil	Muy fácil	Muy fácil
Colombia	Alemania	Colegio privado	Universidad pública	Pequeños empleadores y por los trabajadores autónomos no profesionales	Directivos y profesionales de nivel bajo	Trabajadores manuales cualificados	Supervisores y técnicos de rango inferior	Empleados de nivel alto	NA	NA	NA	4	4	4	4	4	NA	NA	Español	Inglés	Ciencias biológicas	Sí	Post-Docr	2015	1	1	Ninguna	1 mes	NA	Escribe en inglés directamente	Sí, he pedido favores	1	NA	NA	NA	No	NA	NA	NA	NA	No	Regular	Poco	Fácil	Fácil	Regular	Muy fácil	Muy fácil	Fácil
Colombia	Colombia	Colegio privado	Universidad privada	Grandes empleadores, los altos directivos de las empresas y la Administración Pública, profesionales de alto nivel	Grandes empleadores, los altos directivos de las empresas y la Administración Pública, profesionales de alto nivel	Pequeños empleadores y por los trabajadores autónomos no profesionales	NA	Grandes empleadores, los altos directivos de las empresas y la Administración Pública, profesionales de alto nivel	NA	NA	4	4	4	NA	NA	4	NA	NA	Español	Español Ingles	Ciencias biológicas	Sí	Investigador postdoctoral	2002	11	0.9	0.1	30 dias, 2 horas	12 dias, 2 horas	Escribe en inglés directamente	Sí, he pagado	NA	0.8	100	Recursos mixtos	No	Ninguno	Ninguno	NA	NA	Sí	Muy	Regular	Fácil	Fácil	Fácil	Fácil	Fácil	Fácil
Colombia	Bélgica	Colegio privado	Universidad pública	Pequeños empleadores y por los trabajadores autónomos no profesionales	Trabajadores autónomos agrícolas	Trabajadores autónomos agrícolas	Trabajadores no cualificados	Trabajadores manuales cualificados	NA	NA	NA	4	4	4	4	4	NA	NA	Español, Inglés	Español, Inglés	Ciencias biológicas	No	NA	2017	6	1	Ninguna	30 días, 8 horas diarias	No lo sé, no lo he hecho pero supongo que un poco más de la mitad del tiempo que me toma hacerlo en Inglés (~18 días, 8 horas diarias)	Escribe en inglés directamente	Sí, he pedido favores	0.6	Ninguno	NA	NA	No	Ninguno	Ninguno	NA	NA	Sí	Extremadamente	Muy	Regular	Difícil	Difícil	Fácil	Regular	Regular
Colombia	Colombia	Colegio privado	Universidad privada	Pequeños empleadores y por los trabajadores autónomos no profesionales	Pequeños empleadores y por los trabajadores autónomos no profesionales	Trabajadores manuales cualificados	Trabajadores manuales cualificados	Empleados de nivel alto	NA	NA	4	4	4	3	3	4	NA	NA	Español	Ingles	Ciencias biológicas	Sí	Postdoc	2006	18	1	Ninguna	30 dias 5 horas diarias	15 dias 4 horas diarias	Escribe en inglés directamente	Sí, he pagado	NA	0.1	150 euros	Únicamente yo	No	Ninguno	Ninguno	NA	NA	No	Regular	Regular	Muy fácil	Muy fácil	Muy fácil	Muy fácil	Muy fácil	Muy fácil
Colombia	Mexico	Colegio privado	Universidad pública	Pequeños empleadores y por los trabajadores autónomos no profesionales	Directivos y profesionales de nivel bajo	Trabajadores autónomos agrícolas	Trabajadores autónomos agrícolas	Directivos y profesionales de nivel bajo	NA	NA	NA	3	3	NA	NA	4	NA	NA	Español	Inglés	Ciencias biológicas	Sí	Técnico Académico en Institución de educación superior	2010	23	0.8	0.2	30 días, 4 horas diarias	25 días, 4 horas diarias	Escribe en inglés directamente	Sí, ambas posibilidades	0.2	0.5	50	Yo y los coautores	No	Ninguno	Ninguno	NA	NA	No	Regular	Poco	Fácil	Fácil	Fácil	Fácil	Fácil	Fácil
Colombia	México	Colegio público	Universidad pública	Supervisores y técnicos de rango inferior	Supervisores y técnicos de rango inferior	Supervisores y técnicos de rango inferior	Supervisores y técnicos de rango inferior	Empleados de nivel alto	NA	NA	NA	NA	NA	NA	NA	NA	NA	NA	Espanol	Espanol	Ciencias biológicas	No	NA	2016	4	0.2	0.2	30 días, 4 horas	15 días, 6 horas	Escribe en inglés directamente	Sí, he pedido favores	0.1	NA	NA	NA	No	Ninguno	Ninguno	NA	NA	No quise una hacer presentación oral	Regular	Poco	Fácil	Regular	Regular	Fácil	Fácil	Fácil
Colombia	Estados Unidos	Colegio privado	Universidad privada	Grandes empleadores, los altos directivos de las empresas y la Administración Pública, profesionales de alto nivel	Empleados de nivel alto	Directivos y profesionales de nivel bajo	NA	Empleados de nivel alto	NA	NA	NA	NA	NA	NA	NA	NA	NA	NA	Español	Inglés	Ciencias biológicas	No	NA	2018	1	1	Ninguna	15 días, 3 horas diarias	N.A.	Escribe en inglés directamente	Sí, he pedido favores	1	Ninguno	NA	NA	No	Ninguno	Ninguno	NA	NA	No quise una hacer presentación oral	Extremadamente	Muy	Fácil	Regular	Fácil	Muy fácil	Regular	Fácil
Colombia	Colombia	Colegio privado	Universidad privada	Pequeños empleadores y por los trabajadores autónomos no profesionales	Pequeños empleadores y por los trabajadores autónomos no profesionales	Pequeños empleadores y por los trabajadores autónomos no profesionales	NA	Supervisores y técnicos de rango inferior	Supervisores y técnicos de rango inferior	NA	5	5	5	NA	NA	NA	3	NA	Español	Español, inglés	Ciencias biológicas	Sí	Asesor cientifico	2009	6	1	Ninguna	1 mes	No aplica	Escribe en inglés directamente	Sí, he pedido favores	0.5	NA	NA	NA	Sí, he pedido favores	0.5	NA	NA	NA	Sí	Muy	Poco	Muy fácil	Muy fácil	Fácil	Muy fácil	Muy fácil	Fácil
Colombia	Alemania	Colegio privado	Universidad pública	Directivos y profesionales de nivel bajo	Directivos y profesionales de nivel bajo	Trabajadores no cualificados	Directivos y profesionales de nivel bajo	NA	NA	NA	NA	4	4	4	4	4	NA	NA	Español	Español, inglés, alemán	Ciencias biológicas	No	NA	2018	3	1	Ninguna	6 meses, trabajo irregular (aproximadamente 2 diarias)	NA	Escribe en inglés directamente	Sí, he pedido favores	0.3	NA	NA	NA	No	Ninguno	Ninguno	NA	NA	No	Regular	Regular	Fácil	Regular	Fácil	Fácil	Regular	Fácil
Colombia	Sydney	Colegio privado	Universidad pública	Empleados de nivel alto	Empleados de nivel alto	Directivos y profesionales de nivel bajo	Directivos y profesionales de nivel bajo	NA	NA	NA	NA	5	5	3	4	NA	NA	NA	Español	Inglés	Ciencias biológicas	No	NA	2012	2	0.5	0.5	180 días, 5 horas	60 días, 8 horas	Escribe en inglés directamente	Sí, he pedido favores	1	NA	NA	NA	Sí, he pagado	0.5	NA	120	Institución(es) académica(s)	Sí	Muy	Poco	Regular	Fácil	Muy fácil	Muy fácil	Muy fácil	Muy fácil
Colombia	EEUU	Colegio privado	Universidad privada	Trabajadores manuales cualificados	Supervisores y técnicos de rango inferior	Trabajadores autónomos agrícolas	Excluidos del mercado laboral, desempleados sin experiencia previa	Grandes empleadores, los altos directivos de las empresas y la Administración Pública, profesionales de alto nivel	Grandes empleadores, los altos directivos de las empresas y la Administración Pública, profesionales de alto nivel	NA	NA	NA	NA	NA	NA	NA	NA	NA	Español	Español, inglés, Spanglish	Ciencias biológicas	Sí	Profesors	2002	25	1	Ninguna	depende. No es fácil dar un tiempo.	NA	Escribe en inglés directamente	Sí, he pedido favores	0.1	Ninguno	NA	NA	No	Ninguno	Ninguno	NA	NA	No	Nada	Nada	Muy fácil	Muy fácil	Muy fácil	Muy fácil	Muy difícil	Muy fácil
Colombia	Reino Unido	Colegio privado	Universidad pública	Trabajadores manuales cualificados	Supervisores y técnicos de rango inferior	Supervisores y técnicos de rango inferior	Trabajadores manuales cualificados	Empleados de nivel alto	NA	NA	NA	NA	4	NA	NA	6	NA	NA	Español, Inglés	Italiano	Ciencias biológicas	Sí	Postdoc	2014	10	1	Ninguna	1 mes, 3 horas diarias	N/A	Escribe en inglés directamente	Sí, he pedido favores	1	NA	Siempre he tenido un nativo que hace correcciones de estilo	Recursos mixtos	No	NA	NA	NA	NA	No	Nada	Nada	Regular	Difícil	Muy fácil	Fácil	Regular	Muy fácil
Colombia	Alemania	Colegio privado	Universidad privada	Pequeños empleadores y por los trabajadores autónomos no profesionales	Supervisores y técnicos de rango inferior	Trabajadores autónomos agrícolas	Trabajadores autónomos agrícolas	Empleados de nivel alto	NA	NA	NA	5	5	3	3	4	NA	NA	Español	Inglés	Ciencias biológicas	No	NA	2018	2	1	Ninguna	6 meses, tiempo completo (5-8 h)	No se, 1 o dos meses tiempo completo.	Escribe en inglés directamente	Sí, he pedido favores	1	NA	NA	NA	No	Ninguno	Ninguno	NA	NA	Sí	Muy	Muy	Regular	Fácil	Fácil	Fácil	Regular	Fácil
Colombia	Colombia	Colegio privado	Universidad pública	Excluidos del mercado laboral, desempleados sin experiencia previa	Supervisores y técnicos de rango inferior	Trabajadores no cualificados	Trabajadores no cualificados	Empleados de nivel alto	NA	NA	3	4	4	2	2	4	NA	NA	Español	Inglés	Ciencias biológicas	No	NA	2016	0	Ninguna	Ninguna	NA	NA	Escribe en inglés directamente	Sí, he pedido favores	0.5	Ninguno	NA	NA	No	NA	NA	NA	NA	No	Regular	Regular	Difícil	Fácil	Difícil	Regular	Fácil	Difícil
Colombia	México	Colegio privado	Universidad pública	Pequeños empleadores y por los trabajadores autónomos no profesionales	Pequeños empleadores y por los trabajadores autónomos no profesionales	Pequeños empleadores y por los trabajadores autónomos no profesionales	Pequeños empleadores y por los trabajadores autónomos no profesionales	Excluidos del mercado laboral, desempleados sin experiencia previa	Excluidos del mercado laboral, desempleados sin experiencia previa	NA	NA	4	2	NA	4	2	NA	NA	Español	Español, Portugués, Inglés	Ciencias biológicas	Sí	Postdoctor	2014	9	0.7	0.2	45 días, 5 horas diarias	45 días, 5 horas diarias	Escribe en inglés directamente	Sí, he pedido favores	1	Ninguno	NA	NA	No	Ninguno	Ninguno	NA	NA	No	Muy	Poco	Difícil	Regular	Regular	Fácil	Regular	Regular
Colombia	Australia	Colegio privado	Universidad privada	Directivos y profesionales de nivel bajo	Directivos y profesionales de nivel bajo	Trabajadores no cualificados	Trabajadores manuales cualificados	NA	NA	NA	NA	5	NA	NA	NA	NA	NA	NA	Español	Ingles	Ciencias biológicas	Sí	Investigador asociado	2008	33	1	Ninguna	2 semanas, 3 horas diarias	no lo he hecho	Escribe en inglés directamente	Sí, he pedido favores	1	Ninguno	NA	NA	No	Ninguno	Ninguno	NA	NA	No	Poco	Poco	Muy fácil	Fácil	Muy fácil	Fácil	Regular	Muy fácil
Colombia	Colombia	Colegio público	Universidad pública	Excluidos del mercado laboral, desempleados sin experiencia previa	Trabajadores no cualificados	Excluidos del mercado laboral, desempleados sin experiencia previa	Excluidos del mercado laboral, desempleados sin experiencia previa	Trabajadores del comercio y los servicios de rango inferior	Trabajadores del comercio y los servicios de rango inferior	NA	3	3	3	1	1	3	3	NA	Español	Inglés y francés	Ciencias biológicas	No	NA	2013	3	1	Ninguna	120 días	60 días	Escribe en inglés directamente	Sí, ambas posibilidades	1	0.6	200 dolares	Yo y los coautores	Sí, ambas posibilidades	1	0.6	700 dólares	Yo y los coautores	Sí	Extremadamente	Poco	Fácil	Fácil	Fácil	Muy fácil	Muy fácil	Muy fácil
Colombia	Bogotá	Colegio público	Universidad pública	Pequeños empleadores y por los trabajadores autónomos no profesionales	Directivos y profesionales de nivel bajo	Excluidos del mercado laboral, desempleados sin experiencia previa	Excluidos del mercado laboral, desempleados sin experiencia previa	NA	NA	NA	3	3	3	3	3	NA	NA	NA	Español	Portugués	Ciencias biológicas	No	NA	2016	6	0.9	0.1	NA	20 días, 3 horas diarias	Escribe en inglés directamente	Sí, he pedido favores	0.2	NA	NA	NA	No	Ninguno	Ninguno	NA	NA	No	Muy	Poco	Fácil	Fácil	Regular	Fácil	Fácil	Fácil
Colombia	Francia	Colegio privado	Universidad pública	Trabajadores no cualificados	Pequeños empleadores y por los trabajadores autónomos no profesionales	Excluidos del mercado laboral, desempleados sin experiencia previa	Trabajadores no cualificados	Supervisores y técnicos de rango inferior	Trabajadores del comercio y los servicios de rango inferior	Supervisores y técnicos de rango inferior	NA	3	3	2	3	3	3	3	Español	Ingles	Ciencias biológicas	Sí	Postdoc	2013	5	1	Ninguna	50 días, 4 horas	NA	Escribe en inglés directamente	No	Ninguno	Ninguno	NA	NA	No	Ninguno	Ninguno	NA	NA	No	Muy	Muy	Regular	Regular	Fácil	Regular	Regular	Fácil
Colombia	Colombia	Colegio privado	Universidad privada	Grandes empleadores, los altos directivos de las empresas y la Administración Pública, profesionales de alto nivel	Directivos y profesionales de nivel bajo	Directivos y profesionales de nivel bajo	Directivos y profesionales de nivel bajo	Directivos y profesionales de nivel bajo	NA	NA	4	5	5	4	4	5	NA	NA	Español	Español, inglés, portugués	Ciencias biológicas	No	NA	2014	2	1	Ninguna	30 días, 2 horas diarias	NA	Escribe en mi lengua madre y hago la traducción al inglés	Sí, he pedido favores	1	NA	NA	Yo y los coautores	Sí, he pedido favores	1	NA	NA	NA	No quise una hacer presentación oral	Muy	Poco	Fácil	Fácil	Fácil	Muy fácil	Muy fácil	Muy fácil
[truncated: 23 more columns]
